# Supplementary material for: Recent advances in C–CN and C–H bond activation of green nitrile (MeCN) for organo-complexation, cyanation and cyanomethylation
Source: Royal Society of Chemistry journal article supplement (doi:10.1039/d0nj01996h), 2020-01-01
Supplement: d0nj01996h1.pdf [file d0nj01996h1.pdf]

**Supporting Information for**  
**Recent advances in C-CN and C-H bonds activation of green nitrile (MeCN) to organo-complexation, cyanation and cyanomethylation**

*Muhammad Siddique Ahmad<sup>[a]\*</sup> Indra Neel Palidindi<sup>[a]</sup> and Chuanlong Li<sup>[a]</sup>*

<sup>[a]</sup>School of Chemistry and Chemical Engineering, Shanghai Jiao Tong University, 800 Dongchuan Road, Shanghai, 200240, China. E-mail: [msahmad@sjtu.edu.cn](mailto:msahmad@sjtu.edu.cn). Tel: +86-13-167096030

**Table of Contents**

|                              |    |
|------------------------------|----|
| 1. General information ..... | S1 |
| 2. Scheme 1.....             | S1 |
| 3. Scheme 2.....             | S2 |
| 4. Scheme 3.....             | S2 |
| 5. Scheme 4.....             | S3 |

**1. General information**

Experimental part: All the literature are search from scifinder, Scopus, google and commercial available sources. All schemes, tables and figure are drawn by using chem-draw software.

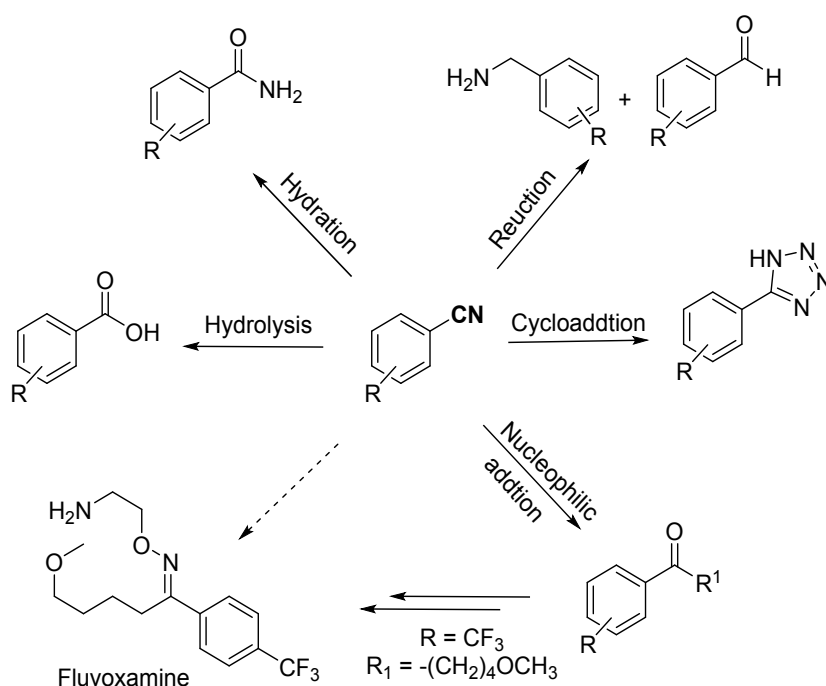

**Scheme 1.** Nitriles as precursors of amines, amides, aldehydes, carboxylic acid

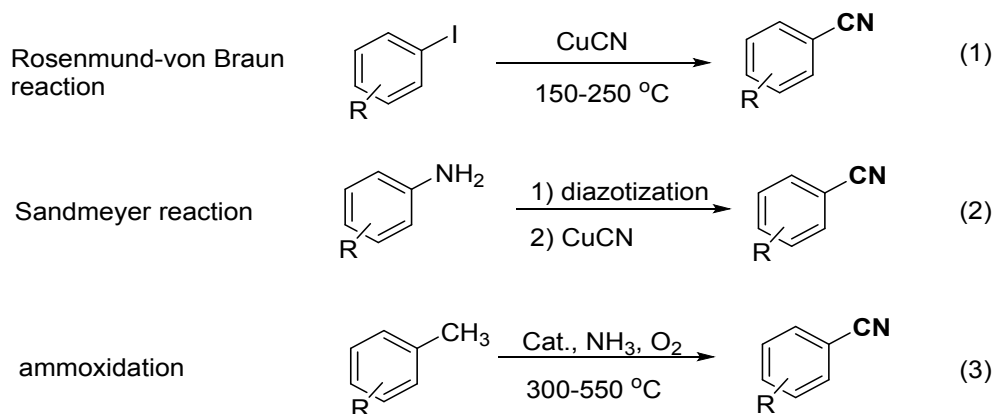

**Scheme 2.** Traditional methodologies for the synthesis of benzonitriles

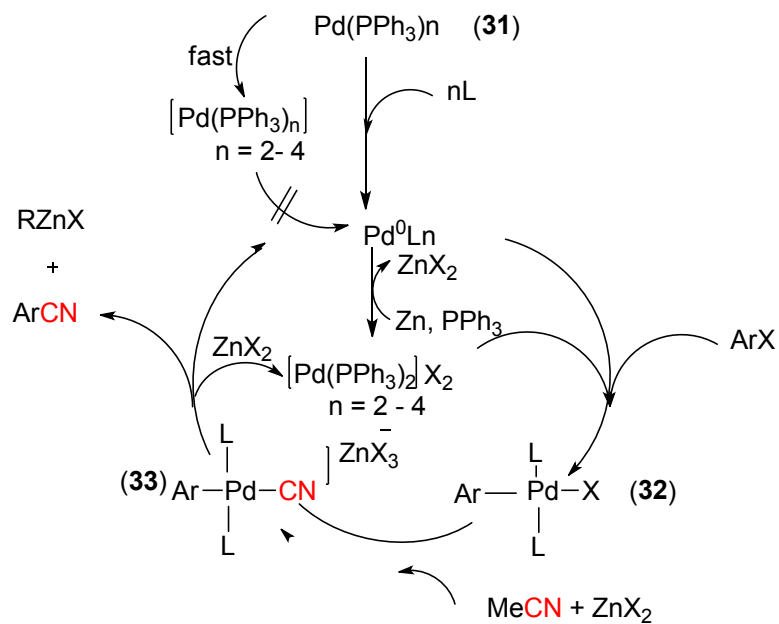

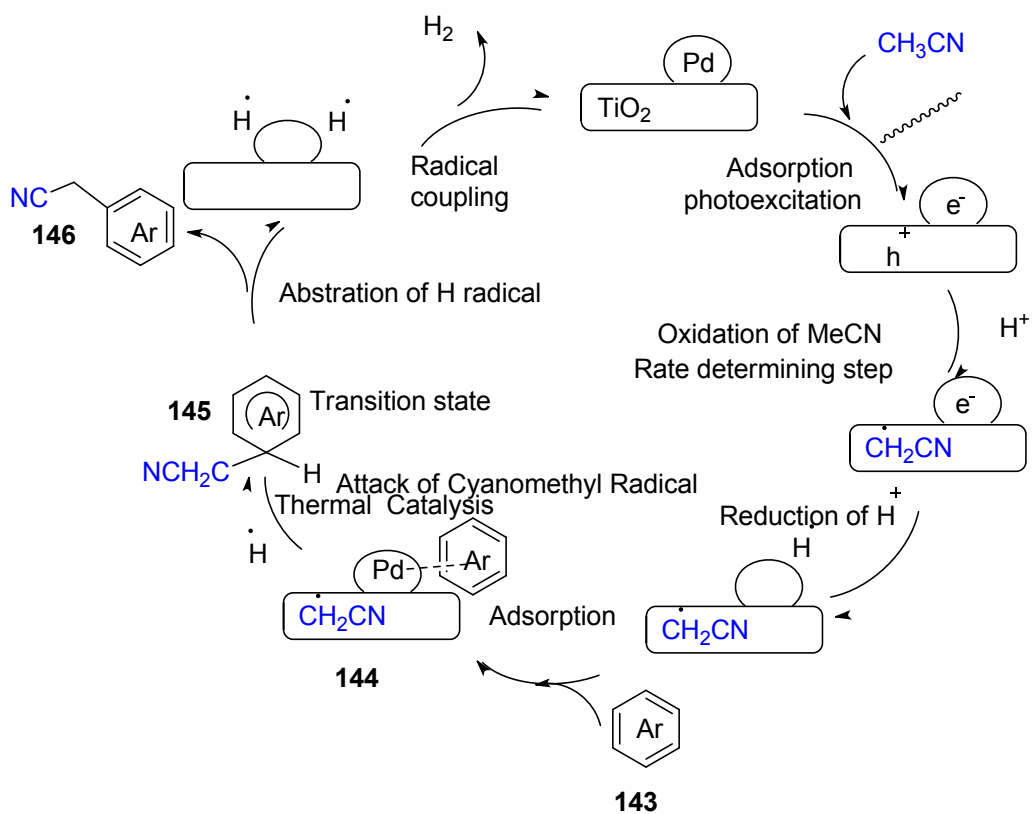

**Scheme 4.** Platinum-catalyzed cyanomethylation of hydrocarbons with acetonitrile
